# Supplementary material for: Psychiatric Case Review and Treatment Intensification in Collaborative Care Management for Depression in Primary Care
Source: Atypon-hosted journal article supplement (doi:10.1176/appi.ps.201700243), 2018-02-01
Supplement: appi.ps.201700243.ds001.pdf [file appi.ps.201700243.ds001.pdf]

**Appendix 1:** Medications included in study documented as being prescribed for depression.

| <b>Class</b>                                 | <b>Name</b>                                                                                                                                   |
|----------------------------------------------|-----------------------------------------------------------------------------------------------------------------------------------------------|
| Anxiolytics                                  | Buspirone                                                                                                                                     |
| Miscellaneous Antidepressants                | Bupropion<br>Nefazodone<br>Trazodone<br>Vilazodone                                                                                            |
| Monoamine Oxidase Inhibitors                 | Phenelzine<br>Selegiline<br>Tranylcypromine                                                                                                   |
| Selective Serotonin Reuptake Inhibitors      | Citalopram<br>Escitalopram<br>Fluoxetine<br>Fluvoxamine<br>Paroxetine<br>Sertraline                                                           |
| Serotonin Norepinephrine Reuptake Inhibitors | Desvenlafaxine<br>Duloxetine<br>Venlafaxine                                                                                                   |
| Tetracyclic Antidepressants                  | Mirtazapine                                                                                                                                   |
| Tricyclic Antidepressants                    | Amitriptyline<br>Clomipramine<br>Desipramine<br>Doxepin<br>Imipramine<br>Nortriptyline                                                        |
| Mood Stabilizers                             | Carbamazepine<br>Gabapentin<br>Lamotrigine<br>Lithium<br>Oxcarbazepine<br>Topiramate<br>Valproic Acid                                         |
| Atypical Antipsychotics                      | Aripiprazole<br>Asenapine<br>Clozapine<br>Iloperidone<br>Lurasidone<br>Olanzapine<br>Paliperidone<br>Quetiapine<br>Risperidone<br>Ziprasidone |

Typical Antipsychotics

Chlorpromazine

Fluphenazine

Haloperidol

Perphenazine

Thioridazine

Thiothixene

Trifluoperazine
